CORRECTION

# Correction: The Effect of Ginger (*Zingiber officinale*) on Platelet Aggregation: A Systematic Literature Review

Wolfgang Marx, Daniel McKavanagh, Alexandra L. McCarthy, Robert Bird, Karin Ried, Alexandre Chan, Liz Isenring

[Table 1](#) appears incorrectly in the published article. Please see the corrected [Table 1](#) here.

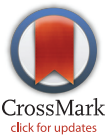

## OPEN ACCESS

**Citation:** Marx W, McKavanagh D, McCarthy AL, Bird R, Ried K, Chan A, et al. (2015) Correction: The Effect of Ginger (*Zingiber officinale*) on Platelet Aggregation: A Systematic Literature Review. PLoS ONE 10(11): e0143675. doi:10.1371/journal.pone.0143675

**Published:** November 23, 2015

**Copyright:** © 2015 Marx et al. This is an open access article distributed under the terms of the [Creative Commons Attribution License](#), which permits unrestricted use, distribution, and reproduction in any medium, provided the original author and source are credited.

**Table 1. Extraction table of reviewed clinical trials.**

| Author/<br>Date       | Bordia et al. 1997                            | Bordia et al. 1997                                       | Janssen et al. 1996                                                                    | Jiang et al. 2004                                                                                                                         | Lumb. 1994                                                                   | Srivastava 1989                                           | Verma et al. 1993                                                                                                                                     | Young et al. 2006                                                                  |
|-----------------------|-----------------------------------------------|----------------------------------------------------------|----------------------------------------------------------------------------------------|-------------------------------------------------------------------------------------------------------------------------------------------|------------------------------------------------------------------------------|-----------------------------------------------------------|-------------------------------------------------------------------------------------------------------------------------------------------------------|------------------------------------------------------------------------------------|
| Study design          | Placebo-controlled trial                      | Placebo-controlled trial                                 | Randomised, placebo-controlled cross-over trial                                        | Randomized, open label, three-way cross-over trial                                                                                        | Randomised, double-blinded placebo-controlled cross-over trial               | Open-label single-arm trial                               | Randomised placebo-controlled trial                                                                                                                   | Cross-over trial                                                                   |
| Sample Size           | N = 60                                        | N = 20                                                   | N = 18                                                                                 | N = 12                                                                                                                                    | N = 8                                                                        | N = 7                                                     | N = 20                                                                                                                                                | N = 10 for each group                                                              |
| Total study period:   | 3 months.                                     | One day                                                  | 6 weeks (3x2 weeks)                                                                    | 3x13 days, 14 days washout period between each study period.                                                                              | 2x1 day, at least 14 days washout period.                                    | 7 days                                                    | 14 days, high-calorie diet for first 7 days, high-calorie diet and ginger/placebo consumed for next 7 days.                                           | 72 days, 4x washout period of 7–10 days, 5x7 days intervention consumed            |
| Population            | Patients with confirmed myocardial infarction | Patients with confirmed myocardial infarction            | Healthy volunteers                                                                     | Healthy male volunteers                                                                                                                   | Healthy male volunteers                                                      | Health female volunteers                                  | Health male volunteers                                                                                                                                | Healthy & Hypertensive volunteers                                                  |
| Outcomes measured at: | Baseline, 1.5 months and 3 months.            | Outcomes measured at: baseline, 4 hours post-consumption | Outcomes measured at day 12 and 14 of each study period.                               | Outcomes measured at multiple time points, starting 2 days pre-warfarin consumption to 7 days post-consumption                            | Outcomes measured immediately before, 3h, and 24h post consumption of ginger | Outcomes measured at baseline and 7 days post-consumption | Outcomes measured at baseline, 7, and 14 days                                                                                                         | Outcomes measured at baseline and 7 days post-consumption for each intervention    |
| Intervention          | Dose: 4g per day of unstandardized capsules   | Dose: 10g single dose of unstandardized capsules         | Dose: 15g raw & 40g cooked ginger placebo, once per day. Contained within 125g custard | Dose: 3.6g (3x0.4g, thrice per day) of unstandardized capsules. Consumed with 25 mg dose of rac-warfarin, consumed once per study period. | Dose: 2g (4x500mg) dried ginger per day of unstandardized capsules           | Dose: 5g raw ginger per day                               | Dose: 5g (4x625mg, twice per day) dry ginger powder of Unstandardized capsules. Consumed with 100g (2x50g) butter, 2 cups of milk, 8 slices of bread. | Dose: 1g dried ginger per day, either alone or in combination with 10mg nifedipine |
| Outcome               | Platelet aggregation                          | Platelet aggregation                                     | Thromboxane B2 production (Payton Aggregation Module)                                  | Platelet aggregation                                                                                                                      | Platelet aggregation                                                         | Platelet thromboxane B2 production                        | Platelet aggregation                                                                                                                                  | Platelet aggregation                                                               |
|                       | - Agonist(s): ADP and Epi                     | - Agonist(s): ADP and Epi                                |                                                                                        | - Agonist(s): AA                                                                                                                          | - Agonist(s): AA, ADP, collagen, ristocetin                                  |                                                           | - Agonist(s): ADP and Epi                                                                                                                             | - Agonist(s): ADP, Epi, collagen                                                   |
|                       | - Method (Device, if reported): Turbidimetric | - Method (Device, if reported): Turbidimetric            |                                                                                        | - Method (Device, if reported): Turbidimetric (Chrono-log)                                                                                | - Method (Device, if reported): Electrical impedance (Chrono-log)            |                                                           | - Method (Device, if reported): turbidimetric (ELVI-840)                                                                                              | - Method (Device, if reported): Turbidimetric (Chronolog 560)                      |
|                       | Fibrinogen                                    |                                                          |                                                                                        | INR                                                                                                                                       | Bleeding time                                                                |                                                           |                                                                                                                                                       |                                                                                    |
|                       | Fibrinolytic activity                         |                                                          |                                                                                        | Plasma warfarin enantiomer protein binding & warfarin enantiomer concentrations                                                           | Platelet count                                                               |                                                           |                                                                                                                                                       |                                                                                    |
|                       |                                               |                                                          |                                                                                        | Urinary S-7-hydroxywarfarin                                                                                                               | Thromboelastography                                                          |                                                           |                                                                                                                                                       |                                                                                    |

(Continued)

Table 1. (Continued)

|                   |                                                                                                                                                                        |                                                                                       |                                                                                                 |                                                                                                                     |                                                          |                                                                                        |                                                                                                                 |                                                                                                                                               |
|-------------------|------------------------------------------------------------------------------------------------------------------------------------------------------------------------|---------------------------------------------------------------------------------------|-------------------------------------------------------------------------------------------------|---------------------------------------------------------------------------------------------------------------------|----------------------------------------------------------|----------------------------------------------------------------------------------------|-----------------------------------------------------------------------------------------------------------------|-----------------------------------------------------------------------------------------------------------------------------------------------|
| Results           | Ginger had no significant effect on both measures of aggregation                                                                                                       | Reduction of both measures of platelet aggregation when compared to placebo (p<0.05). | Both types of ginger had no significant effect on maximum thromboxane B2 production (p = 0.616) | No significant changes in any outcome                                                                               | No significant changes in any outcome at any time point. | Ginger consumption resulted in a 37% inhibition of thromboxane B2 production (p<0.01). | Ginger significantly reduced platelet aggregation using both agonists when compared to placebo group (p<0.001). | Ginger combined with nifedipine resulted in a significant decrease in platelet aggregation (p<0.001). Ginger alone had no significant effect. |
| Country           | India                                                                                                                                                                  | India                                                                                 | Netherlands                                                                                     | Australia                                                                                                           | UK                                                       | Denmark                                                                                | India                                                                                                           | Taiwan                                                                                                                                        |
| Level of evidence | III-1*                                                                                                                                                                 | III-1                                                                                 | II                                                                                              | III-1                                                                                                               | II                                                       | III-3                                                                                  | II                                                                                                              | III-2                                                                                                                                         |
| Comment           | Ginger had no significant effect on blood lipids or blood sugar. Results relating to fenugreek excluded from table. No mention of randomisation. P value not reported. | This study was detailed in same manuscript as previous study.                         |                                                                                                 | No placebo group was included in study. Results relating to ginkgo group excluded from table. P value not reported. |                                                          | Results relating to onion group excluded from table.                                   | Platelet aggregation reduced close to baseline but did not decrease further.                                    | No placebo group. Unclear if participants were blinded.                                                                                       |

Abbreviations: AA, arachidonic acid; ADP, Adenosine Diphosphate; Epi, epinephrine; INR, International Normalised Ratio; TxB2, Thromboxane B2;

\* Indicates some study details were missing and that scoring was based on details available.

doi:10.1371/journal.pone.0143675.t001

## Reference

1. Marx W, McKavanagh D, McCarthy AL, Bird R, Ried K, Chan A, et al. (2015) The Effect of Ginger (*Zingiber officinale*) on Platelet Aggregation: A Systematic Literature Review. PLoS ONE 10(10): e0141119. doi:[10.1371/journal.pone.0141119](https://doi.org/10.1371/journal.pone.0141119) PMID: [26488162](https://pubmed.ncbi.nlm.nih.gov/26488162/)
